# Supplementary material for: Microbiota and Transcriptomic Effects of an Essential Oil Blend and Its Delivery Route Compared to an Antibiotic Growth Promoter in Broiler Chickens
Source: MDPI journal article supplement (doi:10.3390/microorganisms10050861), 2022-04-21
Supplement: s1 [file s1]

## Supplementary Material

**Table S1.** Ingredients, calculated, and analyzed compositions of experimental diets<sup>1</sup> (as-fed basis, percentage (%), unless otherwise stated).

| Ingredients                            | Phases                 |                 |                  |                 |
|----------------------------------------|------------------------|-----------------|------------------|-----------------|
|                                        | Starter (0–14 d)       |                 | Grower (15–28 d) |                 |
|                                        | Control diet           | Antibiotic diet | Control diet     | Antibiotic diet |
| Ingredient Composition                 |                        |                 |                  |                 |
| Corn (ground)                          | 51.08                  | 50.98           | 45.36            | 45.25           |
| Soybean meal-46.5                      | 41.44                  | 41.45           | 36.31            | 36.33           |
| Wheat                                  | -                      | -               | 10               | 10              |
| Animal/vegetable fat                   | 2.93                   | 2.97            | 4.22             | 4.26            |
| Limestone                              | 1.80                   | 1.80            | 1.65             | 1.65            |
| Dicalcium Phosphate                    | 1.24                   | 1.24            | 1.06             | 1.06            |
| DL Methionine premix <sup>2</sup>      | 0.59                   | 0.59            | 0.53             | 0.53            |
| Vitamin/Mineral Premix <sup>3, 4</sup> | 0.50                   | 0.50            | 0.50             | 0.50            |
| Salt                                   | 0.41                   | 0.41            | 0.37             | 0.37            |
| Lysine HCl                             | 0.01                   | 0.01            | 0.00             | 0.00            |
| BMD 110G <sup>5</sup>                  | -                      | 0.05            | -                | 0.05            |
| Total                                  | 100                    | 100             | 100              | 100             |
| Nutrient                               | Calculated composition |                 |                  |                 |
| Metabolizable energy (kcal/kg)         | 3,000                  | 3,000           | 3,100            | 3,100           |
| Crude protein                          | 23                     | 23              | 21.5             | 21.5            |
| Calcium                                | 0.96                   | 0.96            | 0.87             | 0.87            |
| Available phosphorus                   | 0.48                   | 0.48            | 0.44             | 0.44            |
| Sodium                                 | 0.19                   | 0.19            | 0.18             | 0.18            |
| Digestible lysine                      | 1.28                   | 1.28            | 1.15             | 1.16            |
| Digestible methionine + cysteine       | 0.95                   | 0.95            | 0.87             | 0.87            |
| Digestible Tryptophan                  | 0.25                   | 0.25            | 0.23             | 0.23            |
| Digestible Threonine                   | 0.89                   | 0.89            | 0.82             | 0.82            |
| Analyzed composition                   |                        |                 |                  |                 |
| Dry Matter                             | 90.7                   | 90.8            | 93.2             | 93.5            |
| Crude protein                          | 24.8                   | 25              | 22.5             | 23.8            |
| Crude fat                              | 5.50                   | 5.79            | 6.84             | 6.85            |
| Calcium                                | 1.06                   | 1.13            | 1.00             | 0.96            |
| Potassium                              | 1.14                   | 1.16            | 0.99             | 1.04            |
| Phosphorus                             | 0.69                   | 0.70            | 0.67             | 0.62            |
| Sodium                                 | 0.19                   | 0.21            | 0.21             | 0.16            |

<sup>1</sup> Basal diet (NC); antibiotic diet containing NC + 0.05% bacitracin methylene disalicylate (BMD). <sup>2</sup> Supplied/kg premix: DL-Methionine, 0.5 kg; wheat middling, 0.5 kg. <sup>3</sup> Starter vitamin-mineral premix contained the following per kg of diet: 9750 IU vitamin A; 2000 IU vitamin D3; 25 IU vitamin E; 2.97 mg vitamin K; 7.6 mg riboflavin; 13.5 mg D1 Ca-pantothenate; 0.012 mg vitamin B12; 29.7 mg niacin; 1.0 mg folic acid, 801 mg choline; 0.3 mg biotin; 4.9 mg pyridoxine; 2.9 mg thiamine; 70.2 mg manganese; 80.0 mg zinc; 25 mg copper; 0.15 mg selenium; 50 mg ethoxyquin; 1543 mg wheat middling's; 500 mg ground limestone. <sup>4</sup> Grower and Finisher vitamin-mineral premix contained the following per kg of diet: 9750 IU vitamin A; 2000 IU vitamin D3; 25 IU vitamin E; 2.97 mg vitamin K; 7.6 mg riboflavin; 13.5 mg D1 Ca-pantothenate; 0.012 mg vitamin B12; 29.7 mg niacin; 1.0 mg folic acid, 801 mg choline; 0.3 mg biotin; 4.9 mg pyridoxine; 2.9 mg thiamine; 70.2 mg manganese; 80.0 mg zinc; 25 mg copper; 0.15 mg selenium; 50 mg ethoxyquin; 1543 mg wheat middling's; 500 mg ground limestone. <sup>5</sup> Bacitracin methylene disalicylate (providing 55 mg/kg mixed feed); AlphaPharma, Inc., Fort Lee, NJ, USA.

**Table S2.** Sequencing data quality control metrics for 48 liver samples for 6 treatment groups<sup>1</sup>.

| Sample | Raw Reads # | Surviving Reads # | Surviving % | Mapped Reads # | Mapped % |
|--------|-------------|-------------------|-------------|----------------|----------|
| 10D    | 128931886   | 128864410         | 99.95       | 123496072      | 95.83    |
| 11F    | 123815424   | 123749336         | 99.95       | 117546419      | 94.99    |
| 12E    | 100217620   | 100171610         | 99.95       | 95675887       | 95.51    |
| 13A    | 91263880    | 91218332          | 99.95       | 87621362       | 96.06    |
| 14E    | 102874686   | 102803518         | 99.93       | 98365003       | 95.68    |
| 15F    | 89610956    | 89558286          | 99.94       | 85844381       | 95.85    |
| 16B    | 103696522   | 103649450         | 99.95       | 99566563       | 96.06    |
| 17D    | 102727142   | 102673518         | 99.95       | 97718554       | 95.17    |
| 18C    | 102658094   | 102589816         | 99.93       | 97517267       | 95.06    |
| 19E    | 114613450   | 114541804         | 99.94       | 109055322      | 95.21    |
| 1B     | 111989480   | 111935440         | 99.95       | 107217188      | 95.78    |
| 20B    | 105128716   | 105083912         | 99.96       | 101140738      | 96.25    |
| 21D    | 86558618    | 86518732          | 99.95       | 82682287       | 95.57    |
| 22A    | 86201504    | 86143930          | 99.93       | 82400996       | 95.66    |
| 23F    | 97189216    | 97135594          | 99.94       | 92538383       | 95.27    |
| 25F    | 129747010   | 129692014         | 99.96       | 124312086      | 95.85    |
| 26D    | 98609268    | 98564006          | 99.95       | 94445790       | 95.82    |
| 27A    | 103167822   | 103122160         | 99.96       | 98995073       | 96.00    |
| 28E    | 119433662   | 119384804         | 99.96       | 113827077      | 95.34    |
| 29C    | 71048832    | 71015376          | 99.95       | 67880932       | 95.59    |
| 2E     | 122294110   | 122221882         | 99.94       | 116442856      | 95.27    |
| 30B    | 100435658   | 100385796         | 99.95       | 96299990       | 95.93    |
| 31D    | 110590420   | 110541296         | 99.96       | 106048032      | 95.94    |
| 32C    | 157571810   | 157485346         | 99.95       | 150219923      | 95.39    |
| 33A    | 103717506   | 103676040         | 99.96       | 99480220       | 95.95    |
| 34E    | 114963742   | 114911374         | 99.95       | 109633108      | 95.41    |
| 35F    | 99621346    | 99571764          | 99.95       | 94015694       | 94.42    |
| 36B    | 89037488    | 88999280          | 99.96       | 85651443       | 96.24    |
| 37E    | 93691904    | 93644694          | 99.95       | 89307326       | 95.37    |
| 38A    | 74565050    | 74529310          | 99.95       | 71237815       | 95.58    |
| 39F    | 96777946    | 96716112          | 99.94       | 92174462       | 95.30    |
| 3D     | 115361710   | 115292412         | 99.94       | 110464518      | 95.81    |
| 40D    | 81332670    | 81290328          | 99.95       | 77473448       | 95.30    |
| 41B    | 78153658    | 78115760          | 99.95       | 74718506       | 95.65    |
| 42C    | 89136784    | 89093766          | 99.95       | 85224056       | 95.66    |
| 43B    | 84600692    | 84556594          | 99.95       | 80853617       | 95.62    |
| 44E    | 106835414   | 106789686         | 99.96       | 102394089      | 95.88    |
| 45A    | 95541636    | 95493314          | 99.95       | 91460060       | 95.78    |
| 46F    | 76636156    | 76598132          | 99.95       | 73012433       | 95.32    |
| 47C    | 112641994   | 112573638         | 99.94       | 107374095      | 95.38    |
| 48D    | 94773314    | 94702008          | 99.92       | 90015678       | 95.05    |
| 4A     | 93142656    | 93092202          | 99.95       | 88266669       | 94.82    |
| 5C     | 102491666   | 102433822         | 99.94       | 97796357       | 95.47    |
| 6F     | 98781198    | 98720274          | 99.94       | 94109603       | 95.33    |
| 7B     | 834450506   | 833996014         | 99.95       | 798312414      | 95.72    |
| 8A     | 851554080   | 851180034         | 99.96       | 812162674      | 95.42    |
| 9C     | 123838248   | 123780280         | 99.95       | 118300543      | 95.57    |
| 24C    | 88404200    | 88369454          | 99.96       | 84734829       | 95.89    |

<sup>1</sup> Treatments include- A) Negative Control treatment- chicks fed a basal corn-soybean meal-wheat-based diet; B) In-feed antibiotics- chicks fed NC + 0.05% bacitracin methylene disalicylate and C) In-water essential oil- chicks supplied the essential oil via the water route at the recommended dosage of 250 mL/1000 L of drinking water; (D) In ovo saline treatment- eggs injected with 0.2 mL of physiological saline (0.9% NaCl); (E) *In ovo* essential oil treatment- eggs injected with 0.2mL of a saline + essential oil blend mixture at a dilution ratio of 2:1, F) *In ovo* + in-water essential oil treatment- chicks offered the essential oil blend via the *in ovo* and in water route, successively.

**Table S3.** Differentially expressed genes in the liver of broiler chickens as influenced by sex and treatment groups<sup>1</sup>.

| Sex<br>Treatments         | Gene<br>Symbol | Gene<br>Description               | Expression<br>level | log2Fold-<br>Change | P Value | GO Terms                                                  | KEGG Pathways                                                                  |
|---------------------------|----------------|-----------------------------------|---------------------|---------------------|---------|-----------------------------------------------------------|--------------------------------------------------------------------------------|
| <b>Males<br/>(n=28)</b>   |                |                                   |                     |                     |         |                                                           |                                                                                |
| B vs. A                   | INTS2          | integrator complex subunit 2      | Up                  | 0.5                 | <0.01   | snRNA 3'-end processing,                                  | Genetic information processing (Spliceosome)                                   |
|                           | SLC5A10        | solute carrier family 5-member 10 | Up                  | 0.7                 | 0.01    | glucose transmembrane transport                           | Signaling and cellular processes (Sodium glucose cotransporter)                |
|                           | MED13          | mediator complex subunit 13       | Up                  | 0.6                 | 0.01    | mediator complex                                          | Transcription machinery (RNA polymerase II system)                             |
|                           | CEP70          | centrosomal protein 70            | Up                  | 0.4                 | 0.01    | gamma-tubulin binding                                     | Chromosome and associated proteins                                             |
|                           | BVES           | blood vessel epicardial substance | Down                | -0.5                | 0.01    | regulation of microtubule cytoskeleton organization       | Tight junction                                                                 |
|                           | PDE11A         | phosphodiesterase 11A             | Down                | -0.5                | 0.02    | 3',5'-cyclic-nucleotide phosphodiesterase activity        | Phosphoric-diester hydrolases                                                  |
|                           | CLCA1          | chloride channel accessory 1      | Down                | -0.5                | <0.01   | intracellular calcium activated chloride channel activity | Signaling and cellular processes (Ion channels)                                |
| C vs. A                   | BVES           | blood vessel epicardial substance | Down                | -0.6                | 0.01    | regulation of microtubule cytoskeleton organization       | Tight junction                                                                 |
| E vs. A                   | BVES           | blood vessel epicardial substance | Down                | -0.6                | <0.01   | regulation of microtubule cytoskeleton organization       | Tight junction                                                                 |
| <b>Females<br/>(n=20)</b> |                |                                   |                     |                     |         |                                                           |                                                                                |
| B vs. A                   | PANX2          | pannexin 2                        | Up                  | 1.1                 | <0.01   | plasma membrane                                           | signaling and cellular processes (Pores ion channels)                          |
| C vs. A                   | GUCY2C         | guanylate cyclase 2C              | Up                  | 1.1                 | 0.02    | peptide hormone binding                                   | Purine metabolism                                                              |
|                           | MC5R           | melanocortin 5 receptor           | Down                | -0.9                | 0.02    | melanocortin receptor activity                            | Neuroactive ligand-receptor interaction (Signalling molecules and interaction) |
| F vs. A                   | MTMR6          | myotubularin related protein 6    | Down                | -0.6                | 0.02    | peptidyl-tyrosine dephosphorylation                       | Phosphatidylinositol signaling system (Inositol phosphate metabolism)          |

---

<sup>1</sup>Treatments include- A) Negative Control treatment- chicks fed a basal corn-soybean meal-wheat-based diet; B) In-feed antibiotics- chicks fed NC + 0.05% bacitracin methylene disalicylate and C) In-water essential oil- chicks supplied the essential oil via the water route at the recommended dosage of 250 mL/1000 L of drinking water; D) *In ovo* saline treatment- eggs injected with 0.2 mL of physiological saline (0.9% NaCl); E) *In ovo* essential oil treatment- eggs injected with 0.2mL of a saline + essential oil blend mixture at a dilution ratio of 2:1, F) *In ovo* + in-water essential oil treatment- chicks offered the essential oil blend via the *in ovo* and in water route, successively. Each comparison is specified in the format “B vs. A”, where group B is compared to group A, with group A being the denominator for the comparison. Liver tissues (50–100 mg) was sampled from 8 replicate birds/treatment (independent of sex) using 1 mL TRIzol™ (Qiagen, Hilden, Germany).

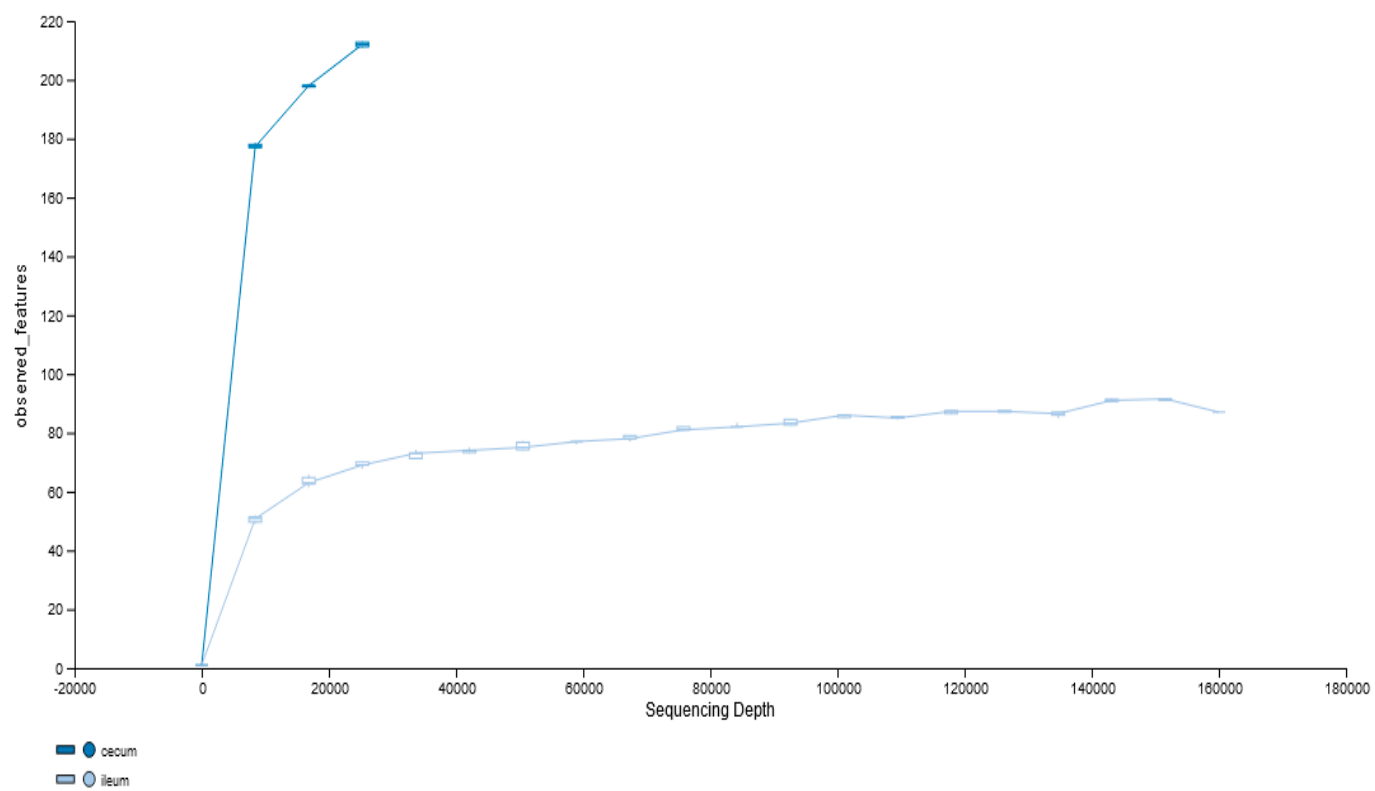

(a)

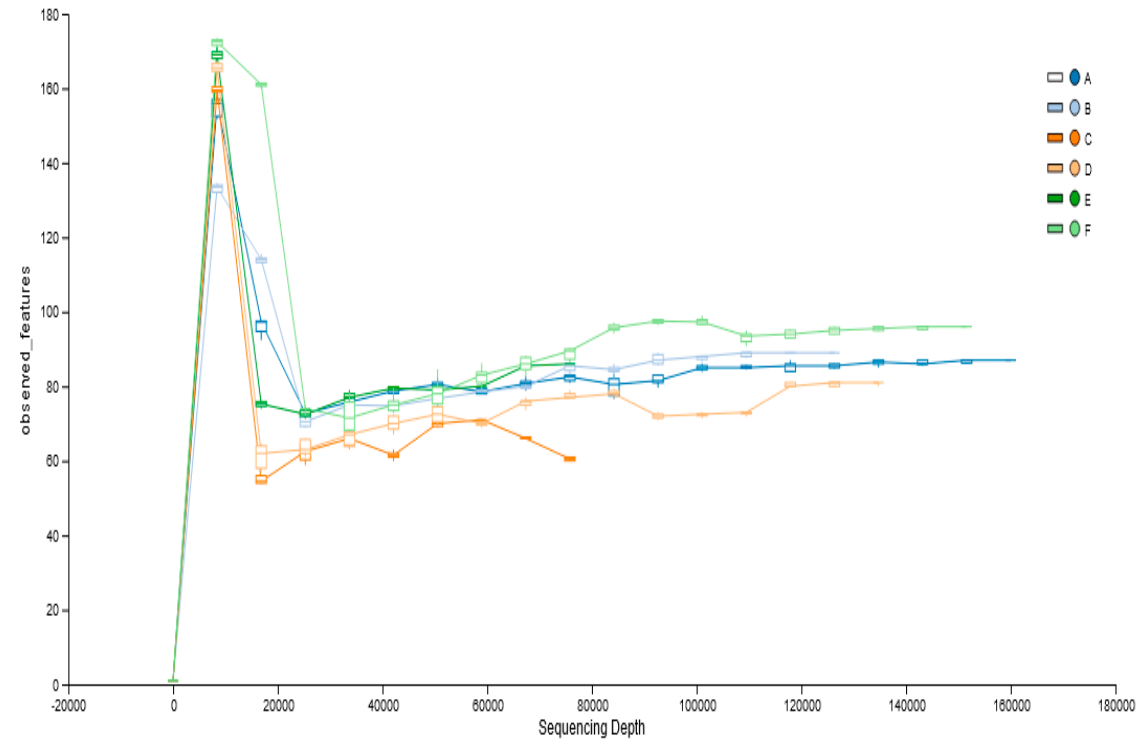

(b)

**Figure S1.** Rarefaction curves of observed features obtained from 16S rRNA gene V4–V5 sequences on the basis of (a) microbiota source- cecum and ileum and (b) treatment- A) chicks fed a basal corn-soybean meal-wheat-based diet (Negative Control treatment; NC); B) chicks fed NC + 0.05% bacitracin methylene disalicylate (in-feed antibiotics); C) chicks supplied the same commercial blend of EOs via the water route (in-water essential oil) at the recommended dosage of 250 mL/1000 L of drinking water; D) *in ovo* saline treatment; E) *in ovo* essential oil treatment; and F) chicks supplied EO via the *in ovo* and water route (*in ovo* + in-water essential oil treatment)

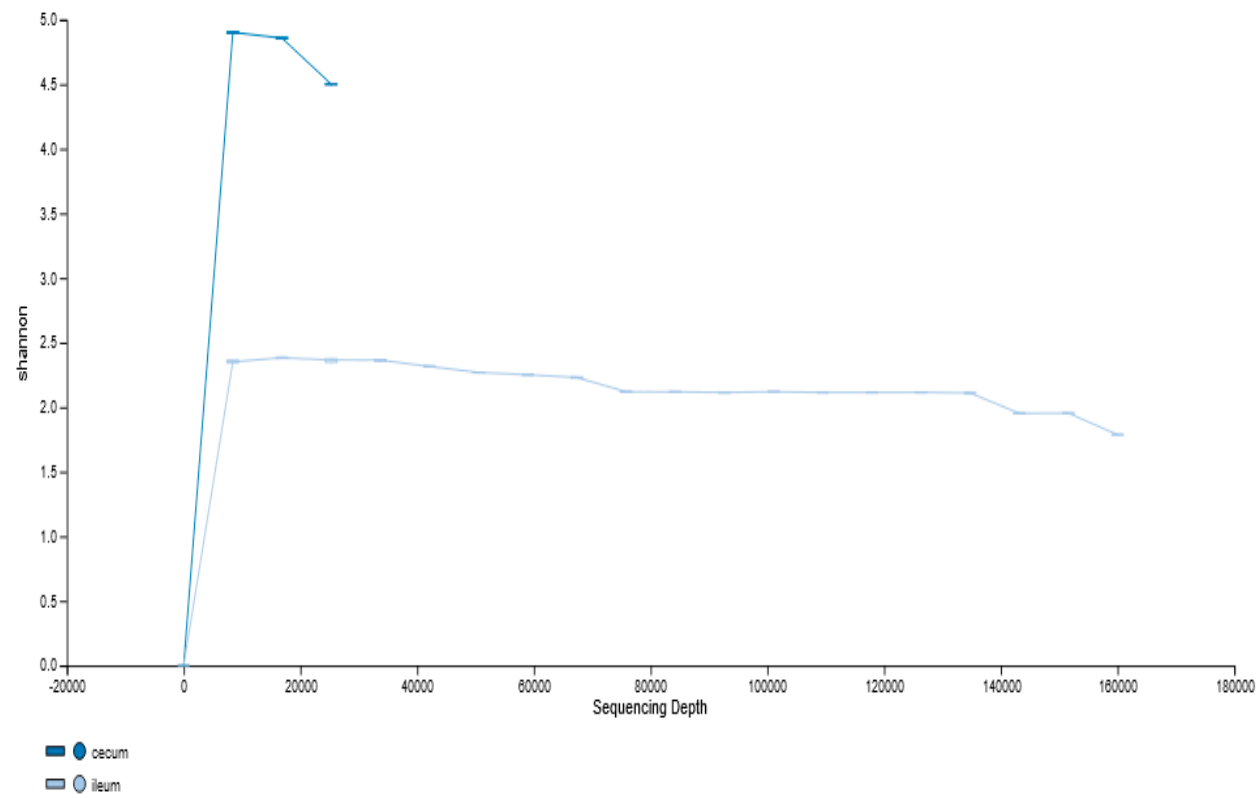

(a)

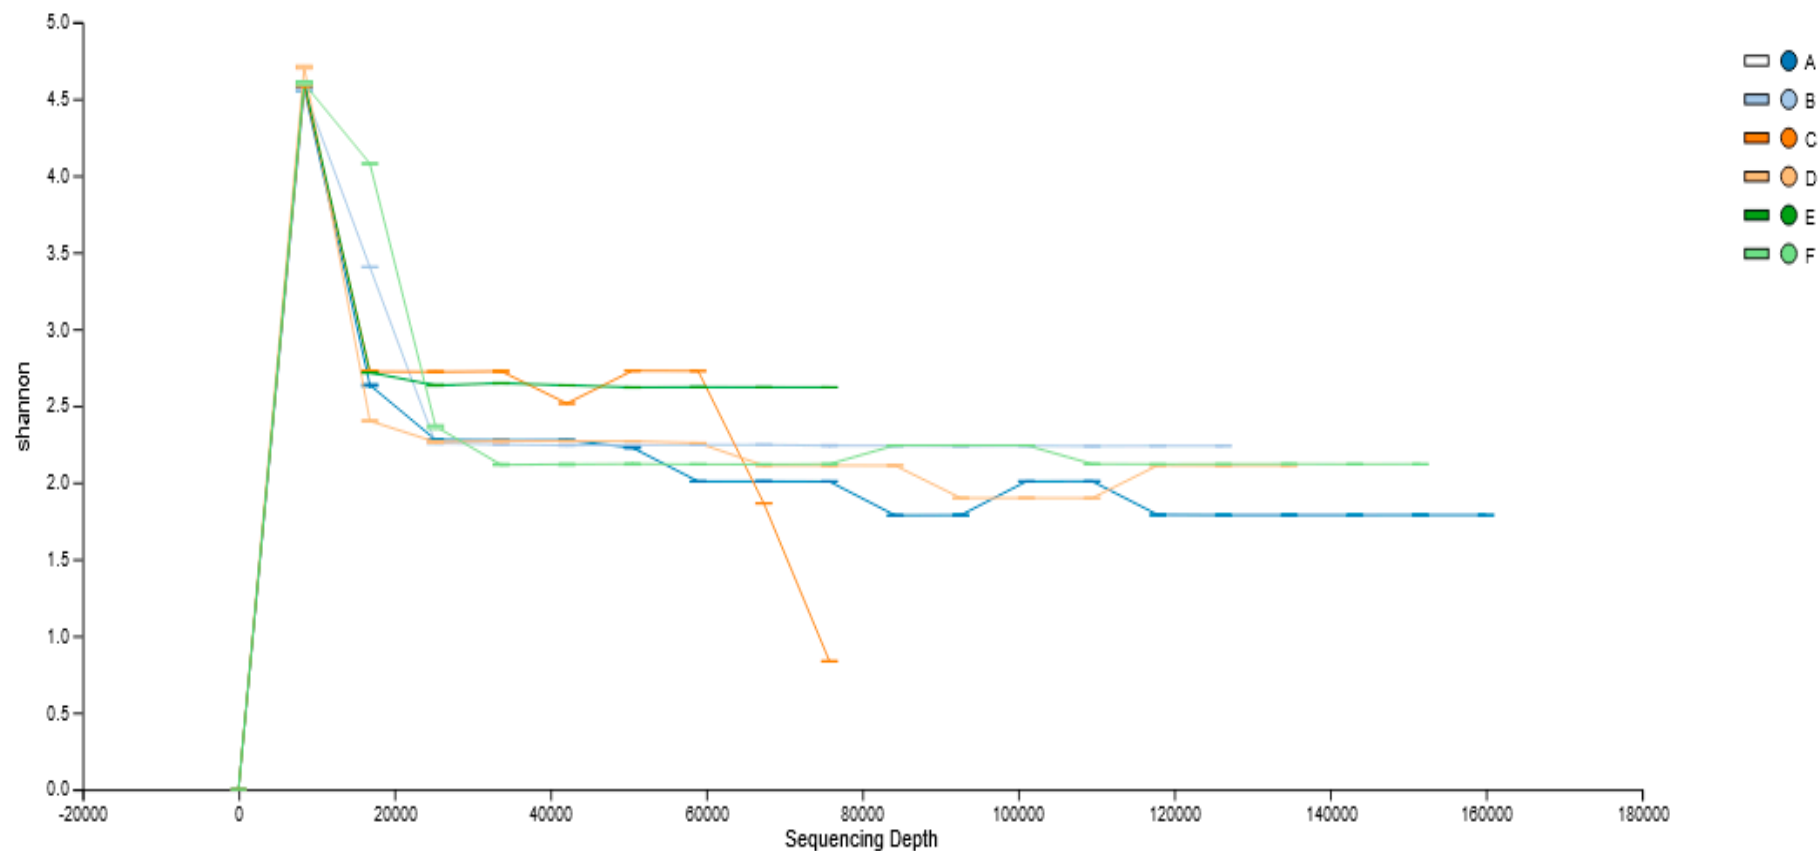

(b)

**Figure S2.** Rarefaction curves of Shannon's index obtained from 16S rRNA gene V4–V5 sequences on the basis of (a) Microbiota source- cecum and ileum and (b) Treatments, which include- A) Negative Control treatment- chicks fed a basal corn-soybean meal-wheat-based diet; B) In-feed antibiotics- chicks fed NC + 0.05% bacitracin methylene disalicylate and C) In-water essential oil- chicks supplied the essential oil via the water route at the recommended dosage of 250 mL/1000 L of drinking water; D) *In ovo* saline treatment- eggs injected with 0.2 mL of physiological saline (0.9% NaCl); E) *In ovo* essential oil treatment- eggs injected with 0.2mL of a saline + essential oil blend mixture at a dilution ratio of 2:1; F) *In ovo* + in-water essential oil treatment- chicks offered the essential oil blend via the *in ovo* and in water route, successively.



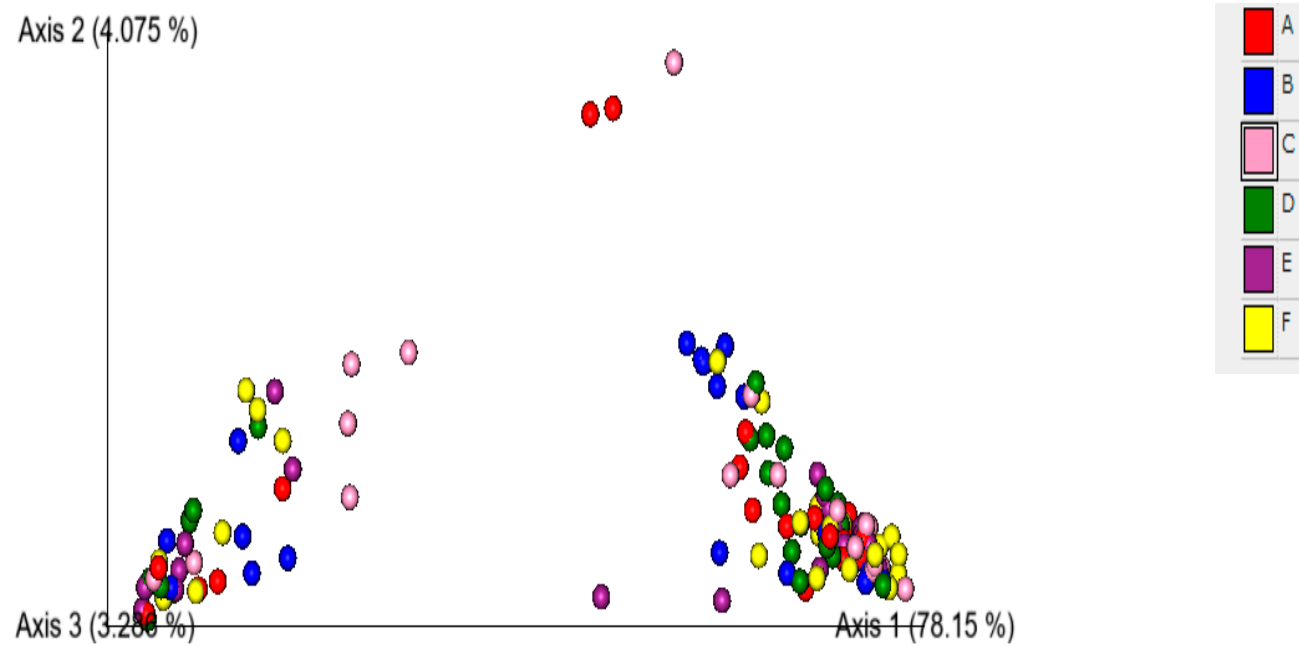

**Figure S3.** PCoA plots based on unweighted UniFrac metric. Each color represents a different comparison of interest. Ileum samples clustered to the left and ceca samples clustered to the right. Treatments include- A) Red: Negative Control treatment- chicks fed a basal corn-soybean meal-wheat-based diet; B) Blue: In-feed antibiotics- chicks fed NC + 0.05% bacitracin methylene disalicylate and C) Pink: In-water essential oil- chicks supplied the essential oil via the water route at the recommended dosage of 250 mL/1000 L of drinking water; D) Green: *In ovo* saline treatment- eggs injected with 0.2 mL of physiological saline (0.9% NaCl); E) Purple: *In ovo* essential oil treatment- eggs injected with 0.2mL of a saline + essential oil blend mixture at a dilution ratio of 2:1, F) Yellow: *In ovo* + in-water essential oil treatment- chicks offered the essential oil blend via the *in ovo* and in water route, successively.

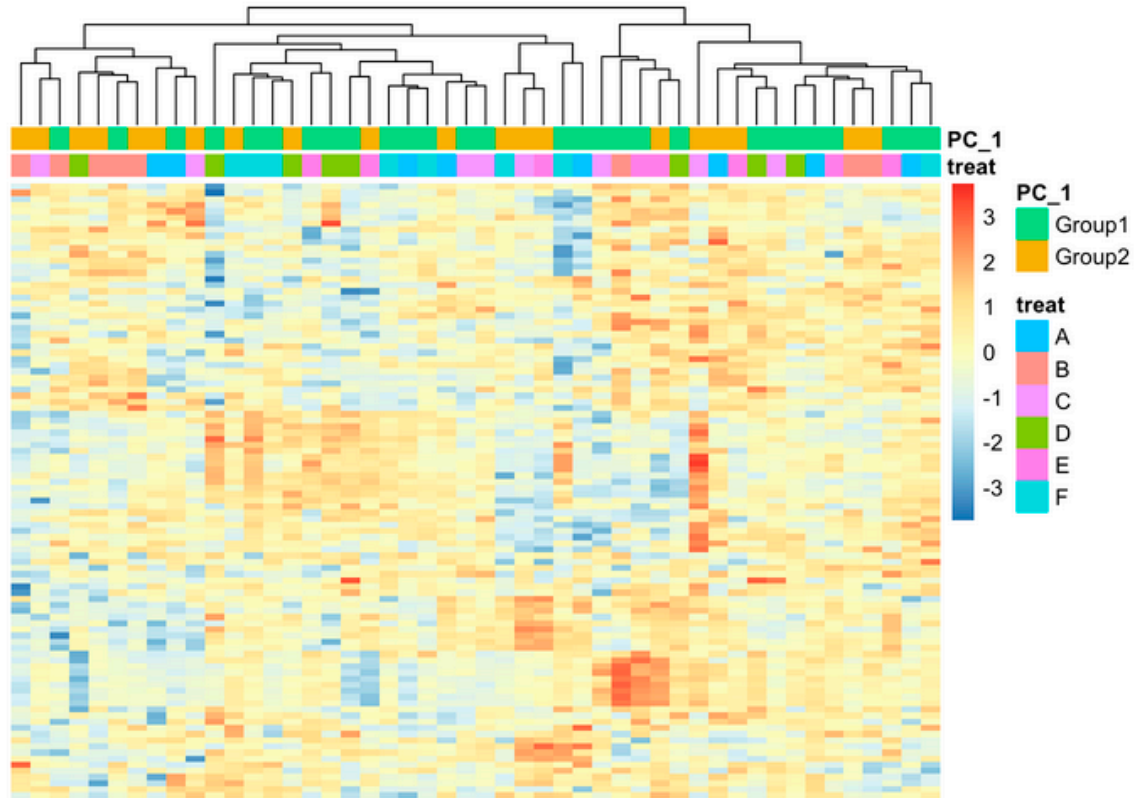

**Figure S4.** Heatmaps of the top 100 most variable genes. Orange = low expression, blue = high expression. Treatments include- A) Negative Control treatment- chicks fed a basal corn-soybean meal-wheat-based diet; B) In-feed antibiotics- chicks fed NC + 0.05% bacitracin methylene disalicylate and C) In-water essential oil- chicks supplied the essential oil via the water route at the recommended dosage of 250 mL/1000 L of drinking water; D) *In ovo* saline treatment- eggs injected with 0.2 mL of physiological saline (0.9% NaCl); E) *In ovo* essential oil treatment- eggs injected with 0.2mL of a saline + essential oil blend mixture at a dilution ratio of 2:1; F) *In ovo* + in-water essential oil treatment- chicks offered the essential oil blend via the *in ovo* and in water route, successively.

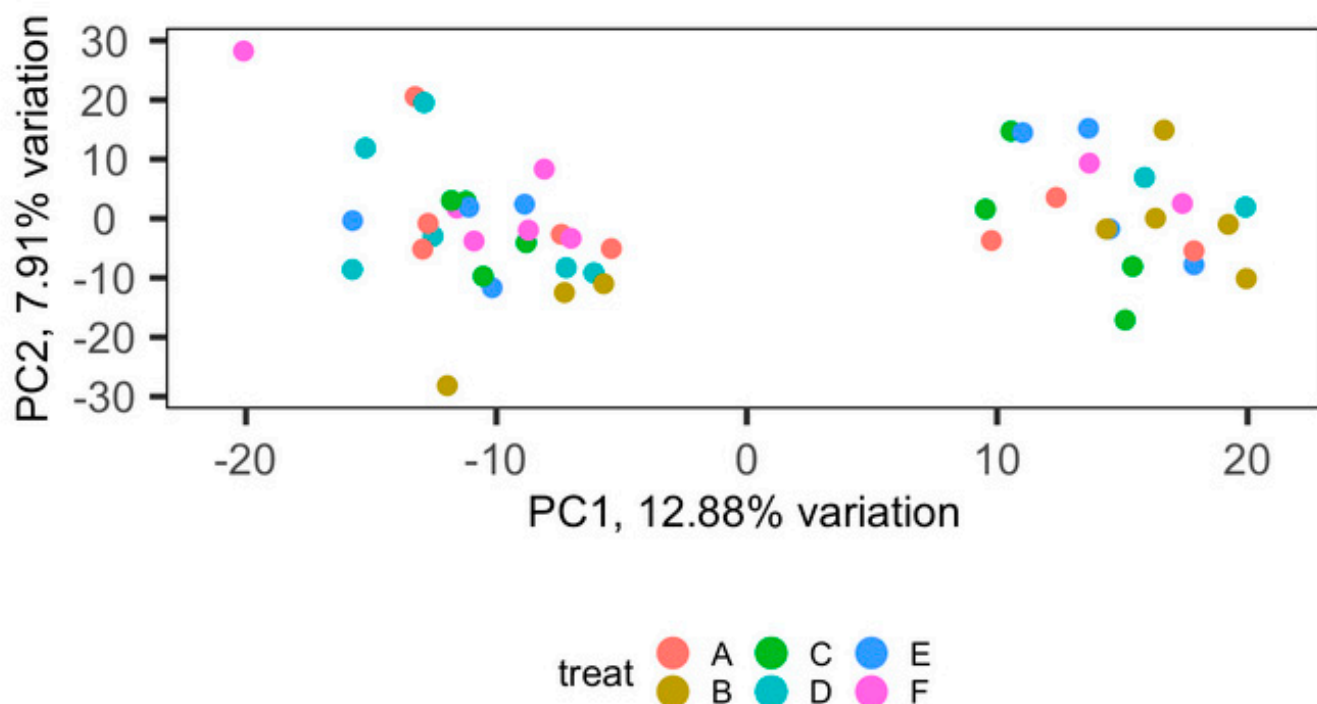

**Figure S5.** Principal component analysis (PCA) was performed with R package gmodels. The more similar the treatment, the closer the distance reflected in PCA. Treatments include- A) Negative Control treatment- chicks fed a basal corn-soybean meal-wheat-based diet; B) In-feed antibiotics- chicks fed NC + 0.05% bacitracin methylene disalicylate and C) In-water essential oil- chicks supplied the essential oil via the water route at the recommended dosage of 250 mL/1000 L of drinking water; D) *In ovo* saline treatment- eggs injected with 0.2 mL of physiological saline (0.9% NaCl); E) *In ovo* essential oil treatment- eggs injected with 0.2mL of a saline + essential oil blend mixture at a dilution ratio of 2:1, F) *In ovo* + in-water essential oil treatment- chicks offered the essential oil blend via the *in ovo* and in water route, successively.

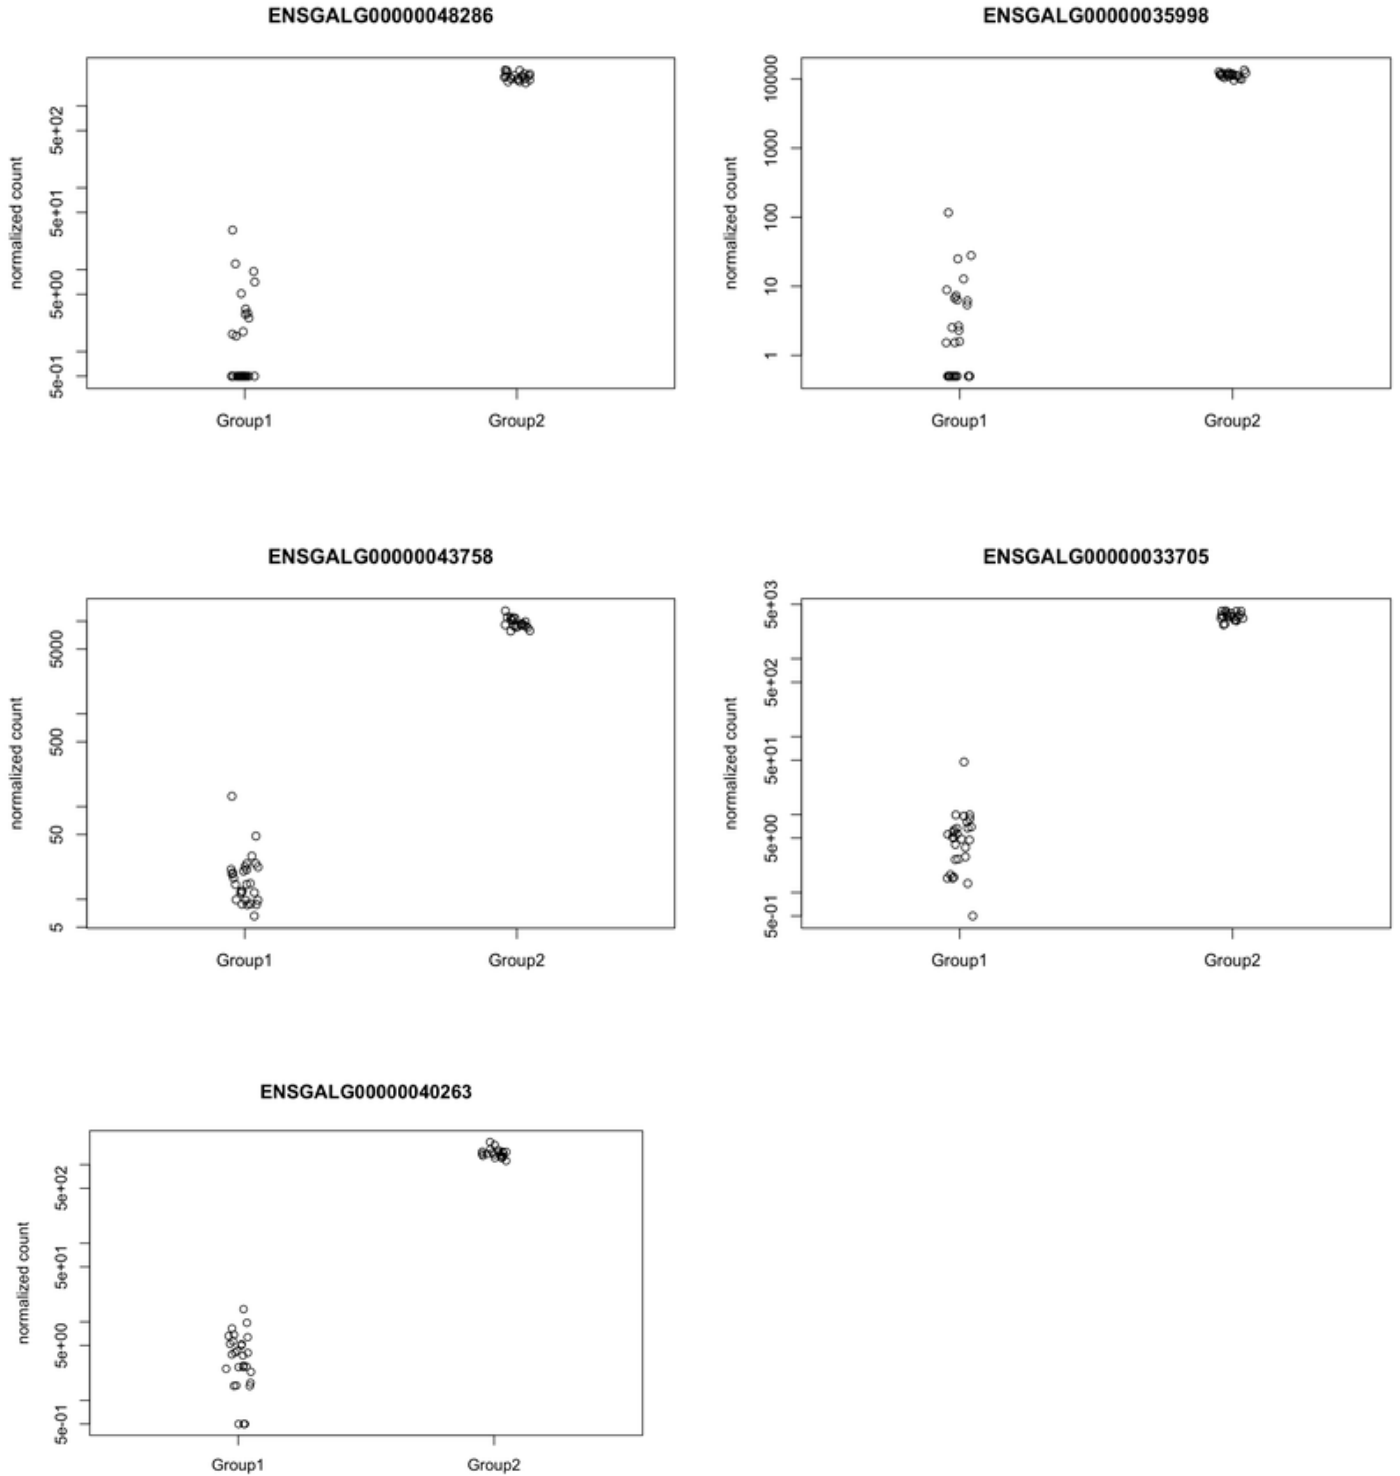

**Figure S6.** Gene expression of chrW gene shows much higher expression in Group2 than Group1, indicating that Group2 samples are probably females (n=20) and Group1 samples are probably males (n=28). Group2 are samples with PC1 score > 0, Group 1 are samples with PC1 scores < 0.

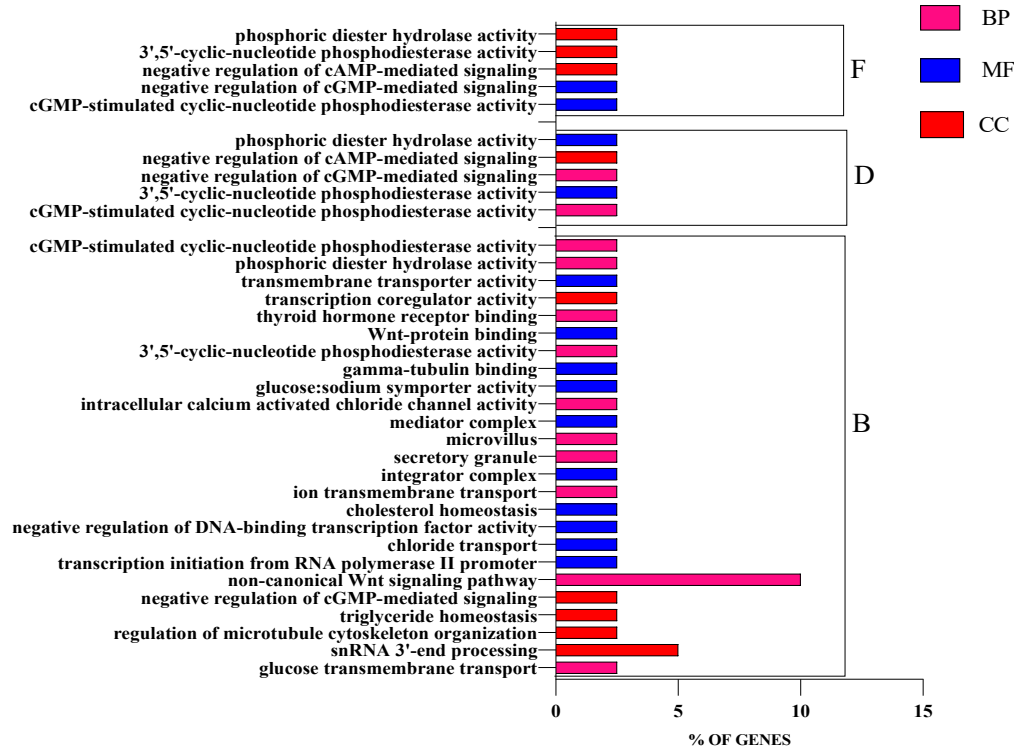

(a)

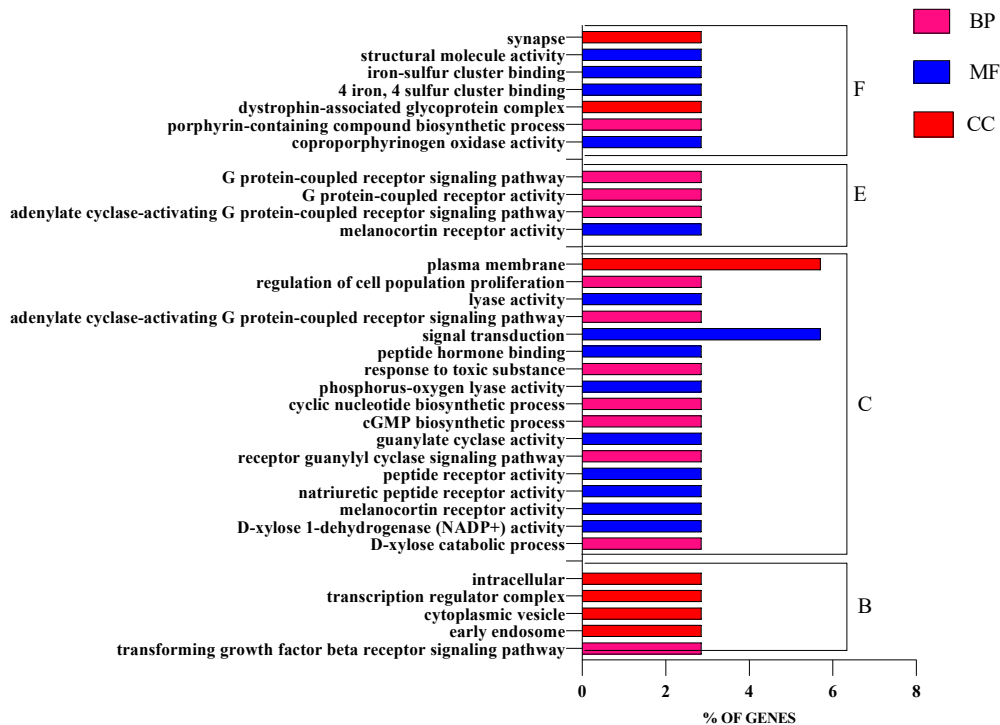

(b)

**Figure S7.** Gene ontology (GO) classifications of differentially expressed genes (DEGs) between treatment groups in (a) male and (b) female transcripts, respectively. Treatments groups include- A) Negative Control treatment- chicks fed a basal corn-soybean meal-wheat-based diet; B) In-feed antibiotics- chicks fed NC + 0.05% bacitracin methylene disalicylate and C) In-water essential oil- chicks supplied the essential oil via the water route at the recommended dosage of 250 mL/1000 L of drinking water; D) *In ovo* saline treatment- eggs injected with 0.2 mL of physiological saline (0.9%

NaCl); E) *In ovo* essential oil treatment- eggs injected with 0.2mL of a saline + essential oil blend mixture at a dilution ratio of 2:1, F) *In ovo* + in-water essential oil treatment- chicks offered the essential oil blend via the *in ovo* and in water route, successively. Gene Ontology terms included both biological process (BP), cellular component (CC), and molecular function (M ).
